# Supplementary material for: Adsorptive Removal of Heavy Metal Ions, Organic Dyes, and Pharmaceuticals by DNA–Chitosan Hydrogels
Source: MDPI journal article supplement (doi:10.3390/gels7030112), 2021-08-06
Supplement: s1 [file s1]

## Supplementary Material

# Adsorptive Removal of Heavy Metal Ions, Organic Dyes, and Pharmaceuticals by DNA–Chitosan Hydrogels

Kayee Chan <sup>1,†</sup>, Kohki Morikawa <sup>1,†</sup>, Nobuyuki Shibata <sup>2</sup>, and Anatoly Zinchenko <sup>1,\*</sup>

<sup>1</sup> Graduate School of Environmental Studies, Nagoya University, Furo-cho, Chikusa-ku, Nagoya 464-8601, Japan; chan.kayee@a.mbox.nagoya-u.ac.jp (K.C.); vivi23.lvcafe@gmail.com (K.M.)

<sup>2</sup> Nagoya Municipal Industrial Research Institute, 3-4-41, Rokuban, Atsuta, Nagoya 456-0058, Japan; shibata.nobuyuki@nmiri.city.nagoya.jp

\* Correspondence: zinchenko@urban.env.nagoya-u.ac.jp; Tel.: +81-52-789-4771

† These authors contributed equally to this work.

### 1. UV-vis absorbance spectra.

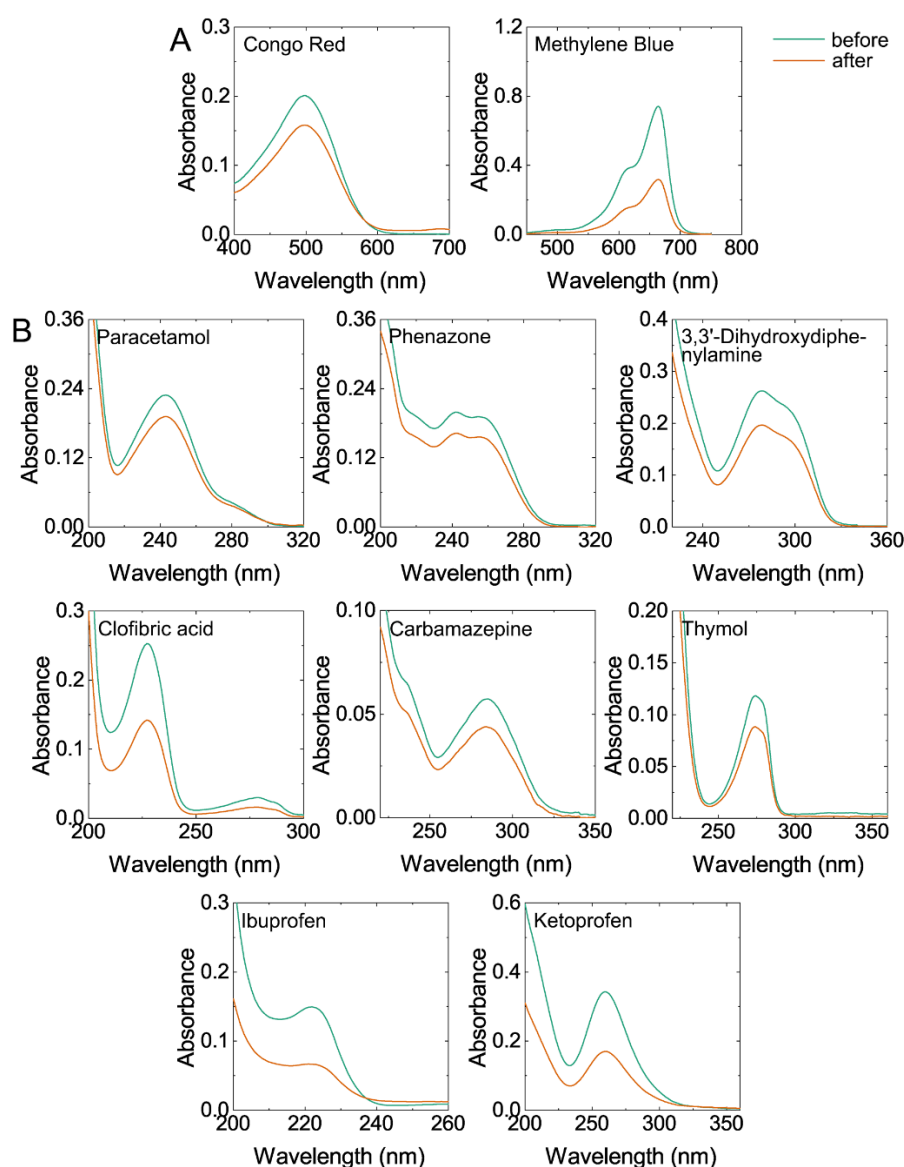

**Figure S1.** UV-vis absorbance spectra of industrial dyes (A) and pharmaceuticals (B) before and after 48 hours of adsorption by DNA-CS hydrogel used to calculate their adsorption capacities. The experimental conditions are given in the Experimental Section.
